# Supplementary material for: Adjusting zinc deposition behaviors by a modified separator to acquire zinc anodes for aqueous rechargeable zinc-ion batteries
Source: Royal Society of Chemistry journal article supplement (doi:10.1039/d3dt02212a), 2023-01-01
Supplement: d3dt02212a1.pdf [file d3dt02212a1.pdf]

## **Adjusting Zinc Deposition Behaviors by A Modified Separator to Acquire Zinc Anodes for Aqueous Rechargeable Zinc-Ion Batteries**

Chaowei Li,<sup>a,b,\*</sup> Wenhui Wang,<sup>b</sup> Shizhuo Liu,<sup>b</sup> Jingchao Zhang,<sup>a</sup> Xiangtao Kong,<sup>a</sup> Zehao Li,<sup>a</sup> Daojun Zhang,<sup>a</sup> Jimin Du,<sup>a</sup> Yagang Yao<sup>b,\*</sup>

<sup>a</sup> Henan Key Laboratory of New Optoelectronic Functional Materials, College of Chemistry and Chemical Engineering, Anyang Normal University, 436 Xian'ge Road, Anyang, 455000 China

<sup>b</sup> National Laboratory of Solid State Microstructures, College of Engineering and Applied Sciences, and Collaborative Innovation Center of Advanced Microstructures, Nanjing University, Nanjing, 210093 China

E-mail: [cwli2014@126.com](mailto:cwli2014@126.com); [ygyao2018@nju.edu.cn](mailto:ygyao2018@nju.edu.cn)

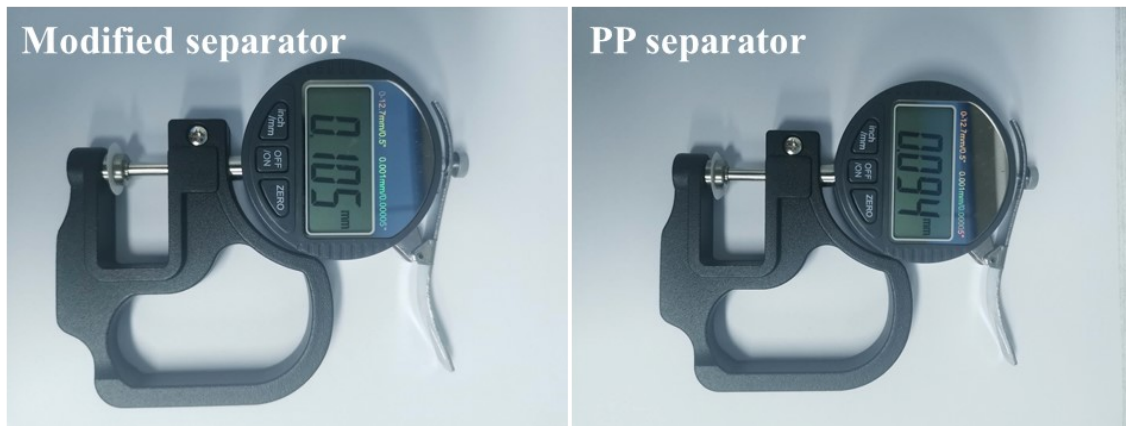

**Fig. S1** The optical photograph of different separators.

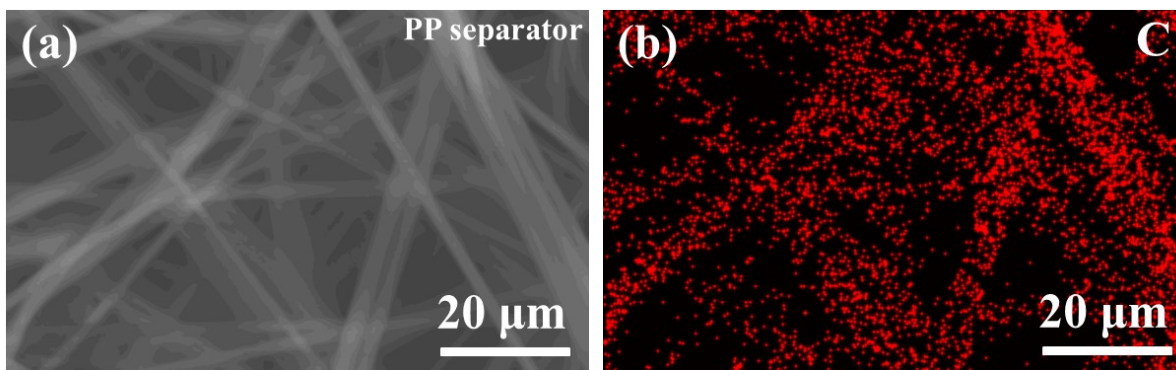

**Fig. S2** The SEM image of PP separator and the element mapping of related C.

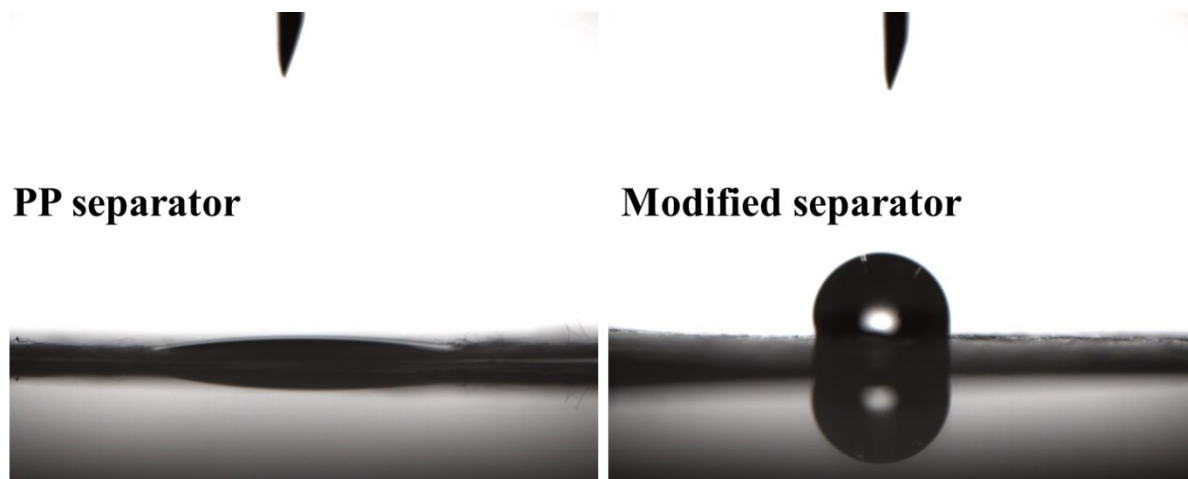

**Fig. S3** The contact angle of different separator.

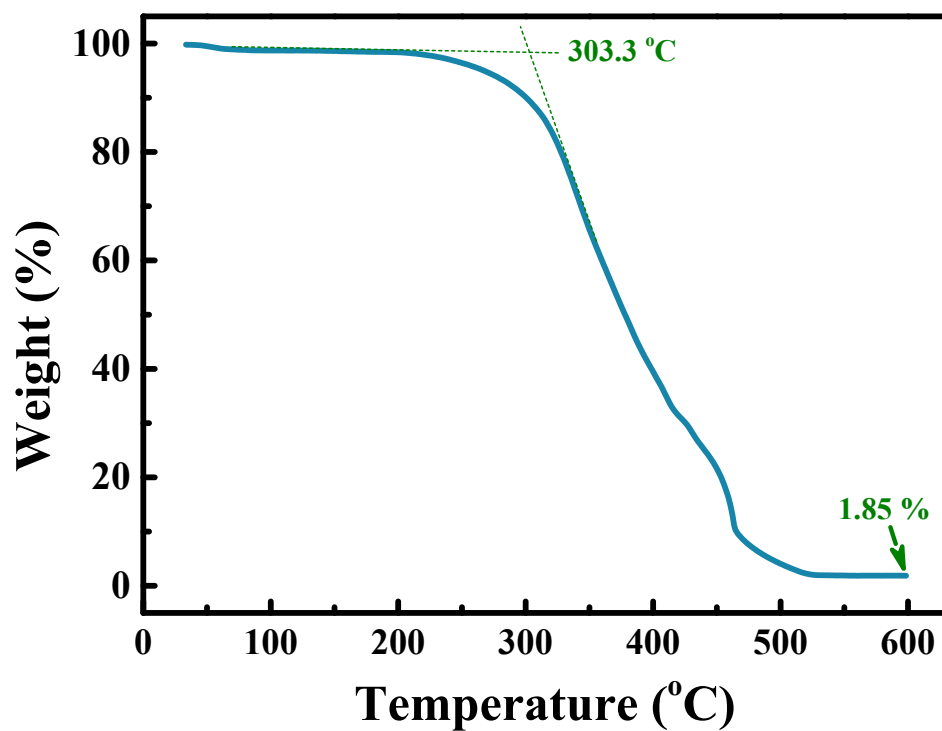

Fig. S4 TG profile of the modified separator.

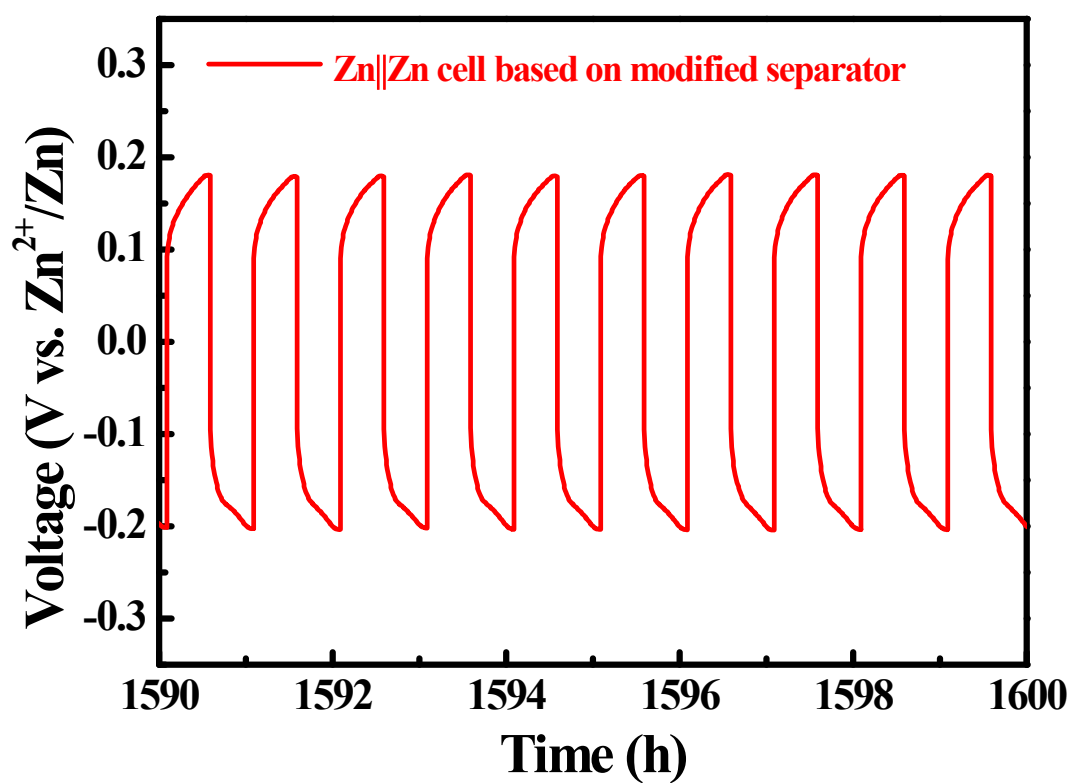

Fig. S5 The enlarged voltage profiles of symmetrical batteries at 1590–1600 h.

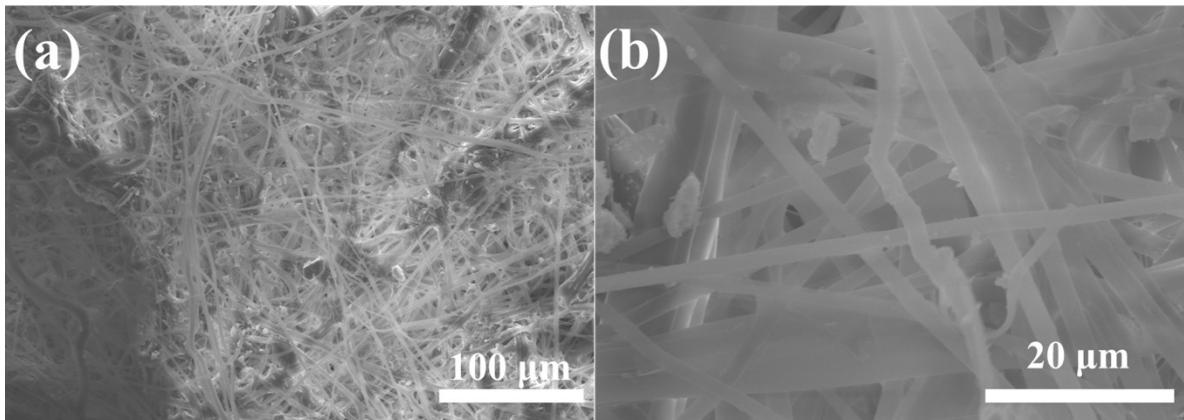

**Fig. S6** The SEM image (a) low and (b) high magnification of PP separator after cycling.

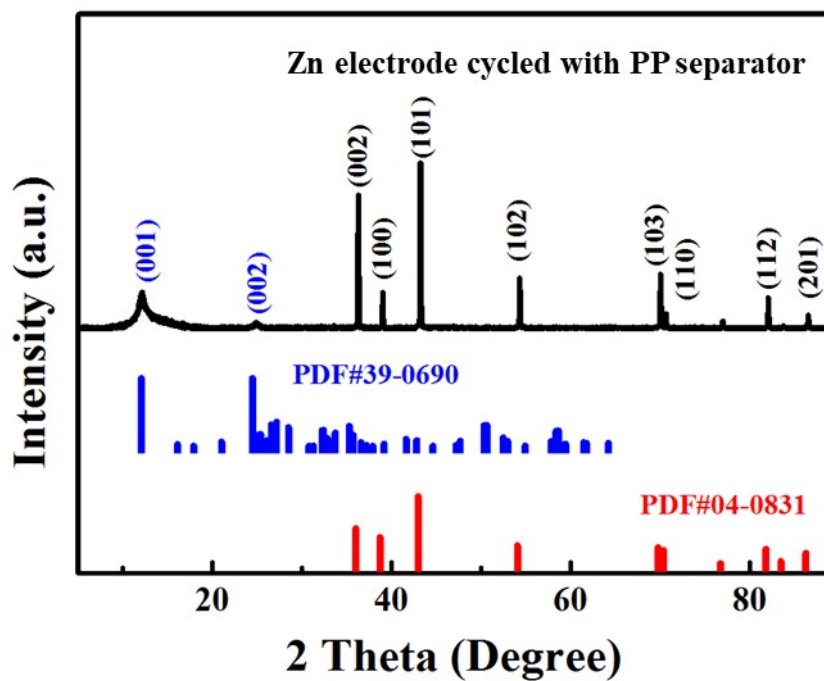

Fig. S7 The XRD patterns of Zn electrode cycled with PP separator.



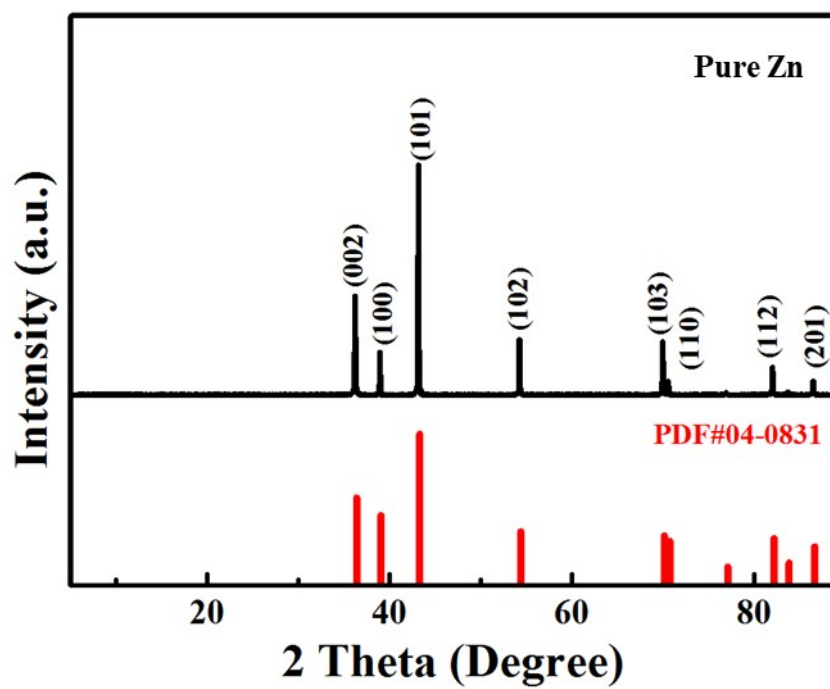

Fig. S8 The XRD patterns of pure Zn foil.

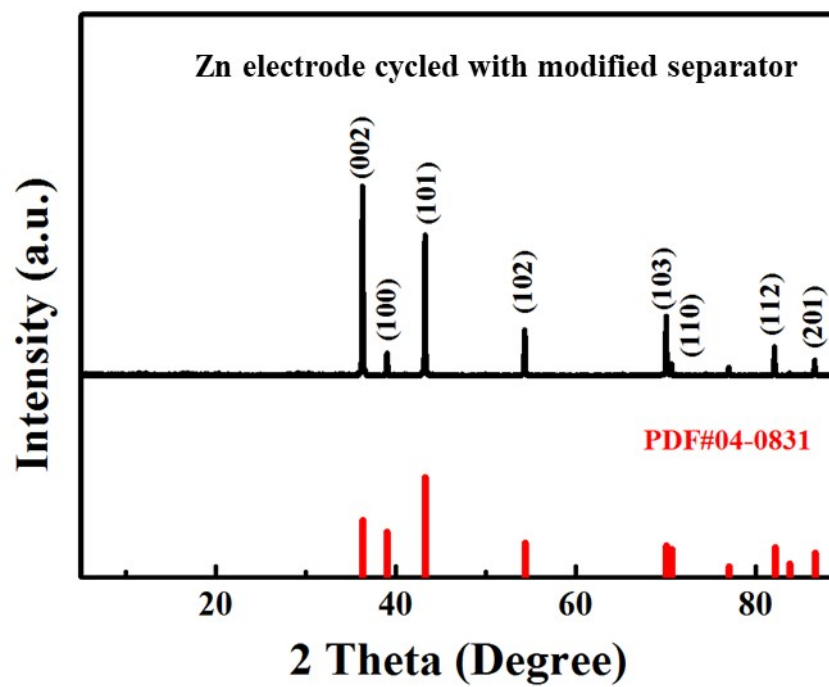

Fig. S9 The XRD patterns of Zn electrode cycled with modified separator.

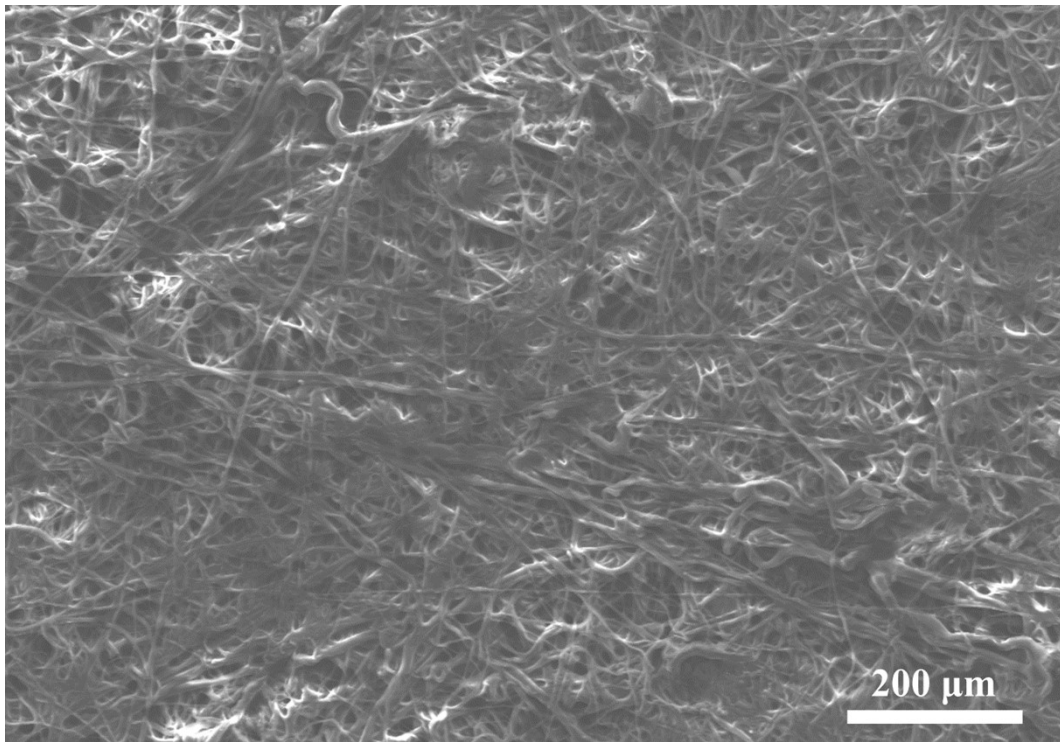

**Fig. S10** The SEM image of modified separator after cycling test

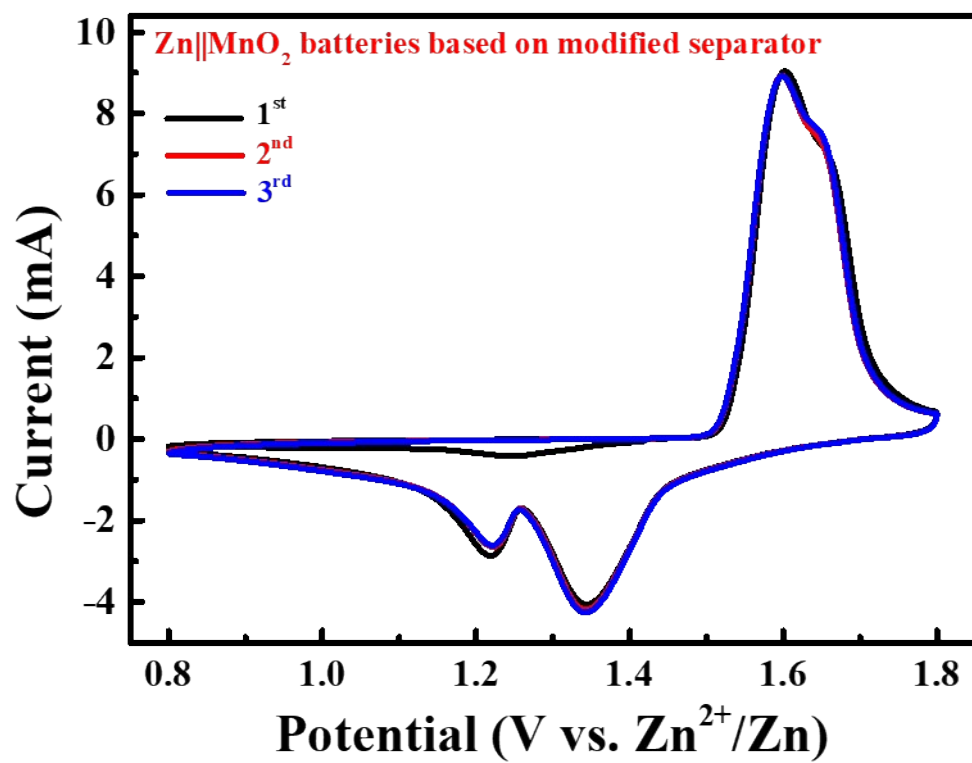

**Fig. S11** Initial three cycles of the cyclic voltammetry (CV) profiles of Zn||MnO<sub>2</sub> batteries based on modified separator.

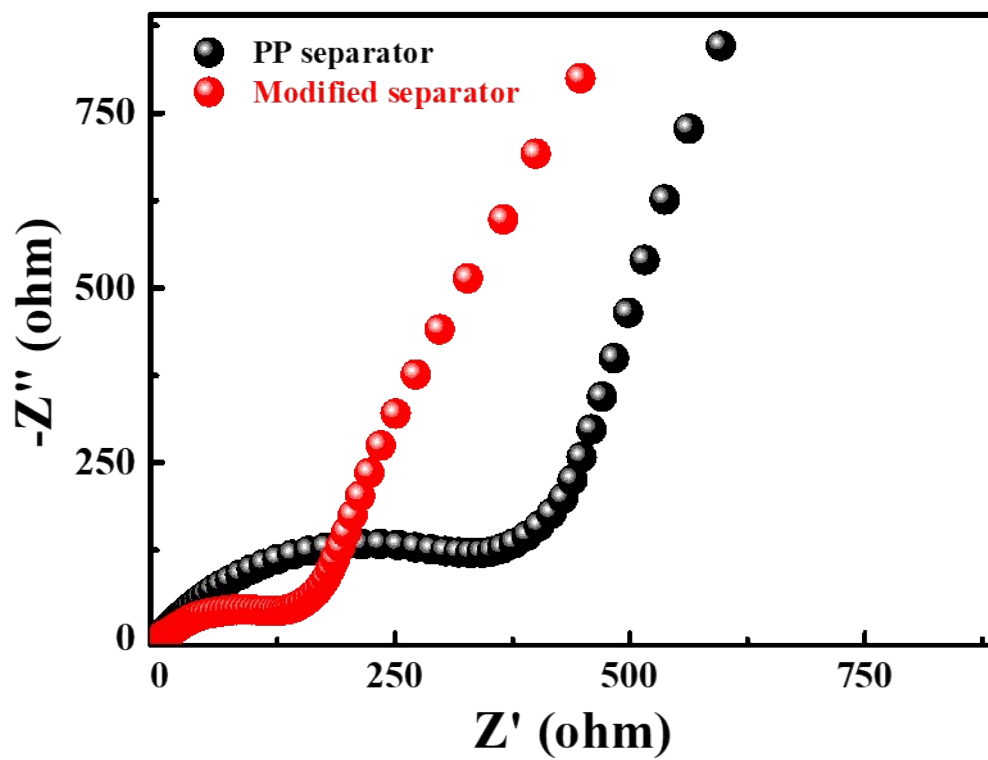

Fig. S12 EIS plots of Zn||MnO<sub>2</sub> batteries based on different separators.

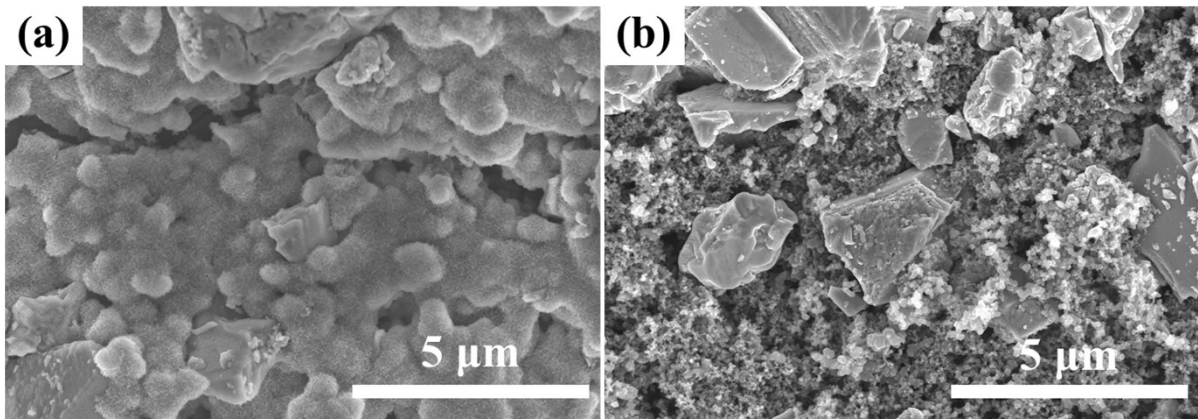

**Fig. S13** The SEM image of (a) cycled MnO<sub>2</sub> cathode and (b) original MnO<sub>2</sub> cathode.

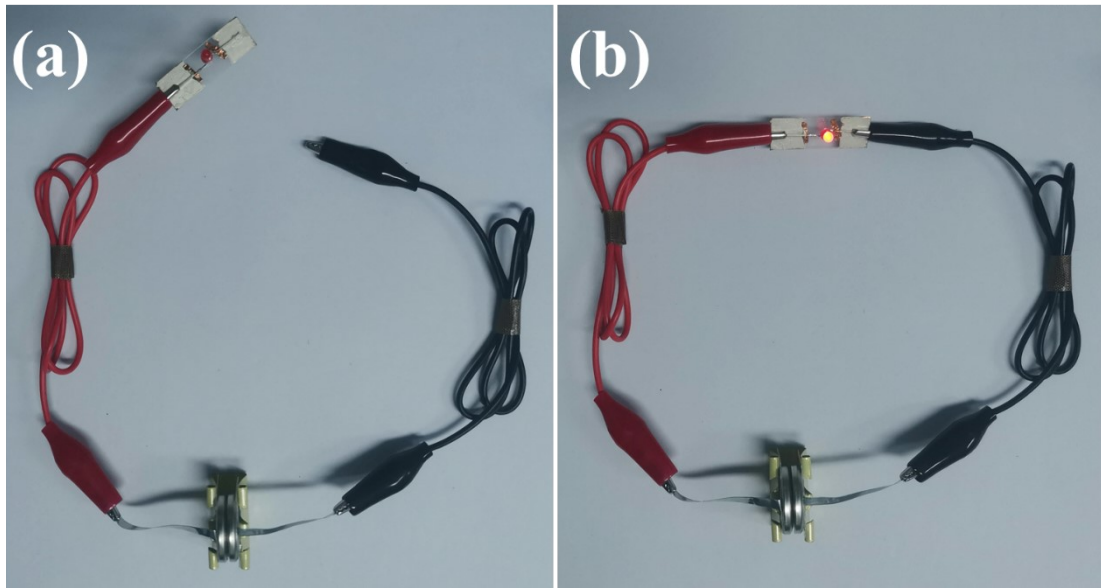

**Fig. S14** The photographs of light emitting diode (LED) power by two Zn||MnO<sub>2</sub> batteries based on modified separator (a) unconnected; (b) connected
